# Supplementary material for: Preservation of nasal function in paramedian endoscopic endonasal approaches: patient series
Source: PubMed Central journal article supplement — J Neurosurg Case Lessons. 2024 Jul 29;8(5):CASE24218. doi: 10.3171/CASE24218 (PMC11301591; doi:10.3171/case24218), 2024-07-29
Supplement: Supplemental_Table_1_CASE24-218.pdf [file Supplemental_Table_1_CASE24-218.pdf]

JOURNAL OF NEUROSURGERY:  
**Case Lessons**

---

**ONLINE ONLY**

**Supplemental material**

<https://thejns.org/doi/abs/10.3171/CASE24218>

**DISCLAIMER** The *Journal of Neurosurgery: Case Lessons* acknowledges that the following section is published verbatim as submitted by the authors and did not go through either the *Journal's* peer-review or editing process.

© 2024 The authors, CC BY-NC-ND 4.0 (<http://creativecommons.org/licenses/by-nc-nd/4.0/>)

| #  | Sex | Age | Side | Diagnosis                           | Location                              | EMMM | Ports   |      |           |      | Comb. app. | Procedures                            | Flap (P=pedicled,F=free)                          | Complications             | Outcom                | Sacrificed nasal structures |   |   |       |   |   | Adjuvant |  |           |
|----|-----|-----|------|-------------------------------------|---------------------------------------|------|---------|------|-----------|------|------------|---------------------------------------|---------------------------------------------------|---------------------------|-----------------------|-----------------------------|---|---|-------|---|---|----------|--|-----------|
|    |     |     |      |                                     |                                       |      | Nostril |      | Sublabial |      |            |                                       |                                                   |                           |                       | Ipsi.                       |   |   | Cont. |   |   |          |  |           |
|    |     |     |      |                                     |                                       |      | Ipsi.   | Con. | Ipsi.     | Con. |            |                                       |                                                   |                           |                       | S                           | M | I | S     | M | I |          |  |           |
|    |     |     |      |                                     |                                       |      |         |      |           |      |            |                                       |                                                   |                           |                       |                             |   |   |       |   |   |          |  |           |
| 1  | F   | 14  | L    | Cholesterol granuloma               | PA                                    | No   | o       | o    |           |      |            | PS, Eth, TPIP, Bil. ExSph             | Middle turbinate flap (PF)                        | None                      | Complete opening      |                             |   |   | P     |   |   |          |  |           |
| 2  | F   | 56  | L    | Chondrosarcoma                      | SS, Cliv, PA, CS                      | No   | o       | o    |           |      |            | PS, Eth, TP, TC, TS, Max., Bil. ExSph | Nasal septum flap (FF)                            | None                      | Near total resection  |                             |   |   |       |   |   |          |  |           |
| 3  | F   | 64  | L    | Adenoid cystic carcinoma(pT4N0M0)   | ITF, PPF                              | Yes  | o       | o    | o         |      |            | Eth, MT, TP, Bil. ExSph               | None                                              | Lt. OME                   | Near total resection  |                             | T |   |       |   |   |          |  | CRT (70G) |
| 4  | F   | 46  | L    | Cholesterol granuloma               | PA                                    | No   | o       | o    |           |      |            | TS, Bil.ExSph                         | None                                              | None                      | Complete opening      |                             |   |   |       |   |   |          |  |           |
| 5  | M   | 53  | R    | Schwannoma                          | MCB, PPF, CS, SS, MS                  | Yes  | o       | o    | o         |      |            | Bil. ExSph                            | Middle turbinate (PF) and nasal septum flaps (PF) | Palatal Numbness, Dry eye | Gross total resection |                             | P |   |       |   |   |          |  |           |
| 6  | M   | 17  | L    | Meningoencephalocele                | LRSS                                  | Yes  | o       | o    |           |      |            | Max, TS, TP, PS, Eth, Bil. ExSph      | Middle turbinate flap (PF)                        | None                      | No epilepsy           |                             |   |   |       |   |   |          |  |           |
| 7  | M   | 15  | R    | Angiofibroma                        | PPF, ITF, CNM, NF                     | Yes  | o       | o    | o         |      |            | PS, Eth, MT, ST, TP, Bil. ExSph       | None                                              | CN V2 palsy               | Gross total resection | T                           | T |   |       |   |   |          |  |           |
| 8  | M   | 13  | L    | Angiofibroma                        | PPF, ITF, CNM, NF                     | Yes  | o       | o    | o         |      |            | PS, Eth, MT, ST, TP, Bil. ExSph       | Sphenoid sinus mucosa (FF)                        | None                      | Gross total resection | T                           | T |   |       |   |   |          |  |           |
| 9  | F   | 41  | L    | Follicular lymphoma (G3)            | PFS                                   | Yes  | o       | o    |           |      |            | Eth, Max, TP, PS                      | None                                              | None                      | (Biopsy)              |                             |   |   | P     |   |   |          |  |           |
| 10 | M   | 46  | R    | Adenoid cystic carcinoma (pT4aN0M0) | PPF, MNM, Bil.CNC, Bil, EthS, Bil. SS | Yes  | o       | o    |           |      |            | ST, MT, PS, TP, Bil. Eth              | None                                              | None                      | Subtotal resection    | T                           | P |   |       |   |   |          |  | CRT (52G) |
| 11 | M   | 42  | R    | Cholesterol granuloma               | PA                                    | No   | o       | o    |           |      |            | TS, Bil.ExSph                         | None                                              | None                      | Complete opening      |                             |   |   |       |   |   |          |  |           |
| 12 | F   | 49  | R    | Chondrosarcoma                      | PA, Bil. SS, Bil. Cliv                | No   | o       | o    | o         |      |            | TS, TP, Bil. Max and Eth, ExSph       | Nasal septum flap (PF)                            | Dysosmia                  | Gross total resection |                             | T |   |       |   |   |          |  |           |
| 13 | F   | 68  | R    | Fibrous Meningioma                  | MCB, ITF                              | Yes  | o       | o    | o         |      | OZ         | Eth, TP, ExSph                        | None                                              | None                      | Gross total resection |                             |   |   |       |   |   |          |  |           |
| 14 | F   | 16  | R    | Optic nerve compression             | OC                                    | No   | o       | o    |           |      |            | TS, Eth                               | Sphenoid sinus mucosa (FF)                        | None                      | No improvement        |                             |   |   |       |   |   |          |  |           |
| 15 | F   | 50  | L    | Schwannoma                          | PFS, ITF, JF                          | No   | NS      | NS   | NS        | NS   | NS         | Transoral approach                    | None                                              | None                      | Gross total resection |                             |   |   |       |   |   |          |  |           |
| 16 | F   | 55  | R    | Chondrosarcoma                      | CS, Sella, JF, HGC, SS, PA            | No   | o       | o    |           |      |            | PS, TP, Bil. Eth and Max Rt. ExSph    | Nasal septum flap (PF), PS-NI(PF)                 | CN VI palsy               | Subtotal resection    |                             | T |   |       |   |   |          |  |           |
| 17 | M   | 82  | R    | V2 Schwannoma                       | MNM, ITF, PPF                         | Yes  | o       |      |           |      |            | Eth, TP                               | None                                              | None                      | Gross total resection | P                           | P |   |       |   |   |          |  |           |

Supplemental Table 1. Case profiles

Bil., bilateral; Cliv, clivus; CN, cranial nerve; Con., contralateral; Comb., combined; CRT, chemoradiotherapy; CS, cavernous sinus; CNM, common nasal meatus; Eth, complete ethmoidectomy; EthS, ethmoid sinus; ExSph, extended transsphenoidal approach; FF, free flap; HGC, hypoglossal canal; I, inferior; Ipsi., ipsilateral; ITF, infratemporal fossa; JF, jugular foramen; LRSS, lateral recess of sphenoid sinus; M, middle turbinate; Max, maxillectomy; MCB, middle cranial base; MNM, middle nasal meatus; MS, maxillary sinus; MT, middle turbinectomy; NP, nasopharynx; PFS, parapharyngeal space; PS, posterior septectomy; OC, optic canal; OME, otitis media with effusion; OZ, orbitozygomatic approach; PA, petrous apex; P, partial; PF, pedicle flap; PPF, pterygopalatine, fossa; SS, sphenoid sinus; Sella, sella turcica; ST, superior turbinectomy; S, superior turbinate; T, total; TC, transclival approach; TP, transpterygoid approach; TPIP, transpterygoid infrapetrous approach; TS, transsphenoidal approach
